# Supplementary material
Source: PubMed Central journal article supplement (PMC2000383)

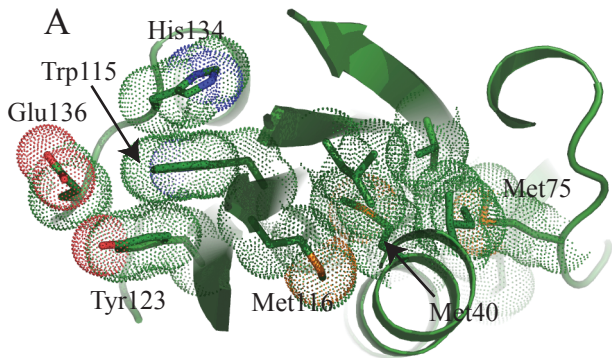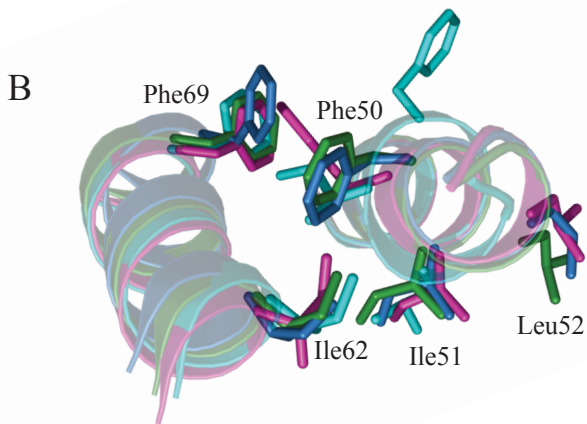

Supplement: pnas_0707581104_1.pdf [file pnas_0707581104_1.pdf]

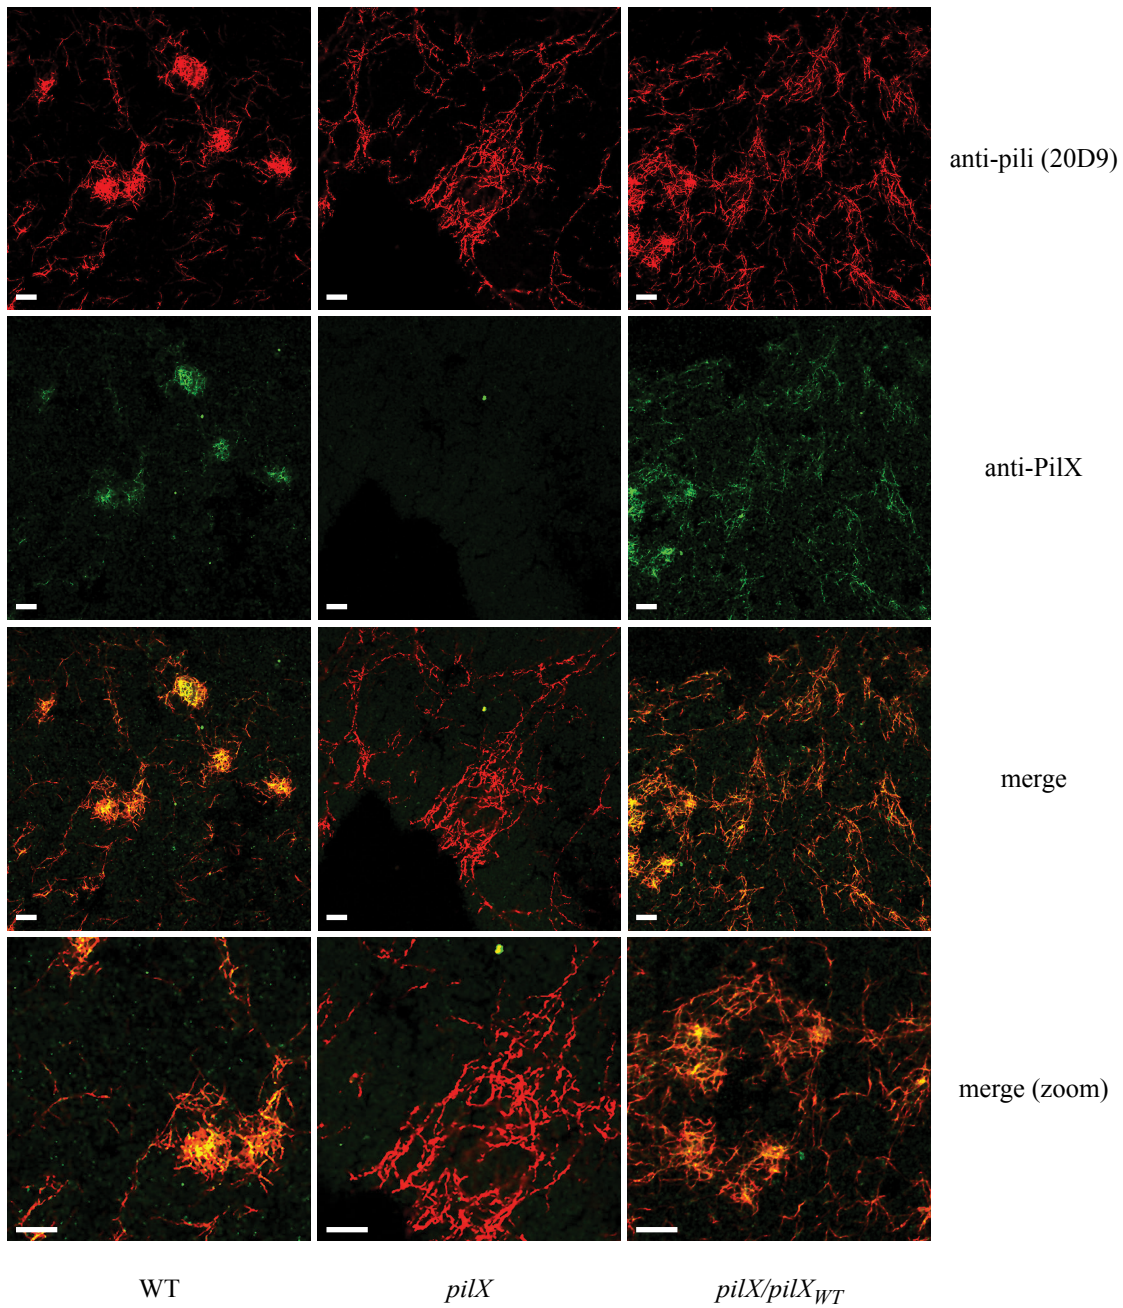

Supplement: pnas_0707581104_2.pdf [file pnas_0707581104_2.pdf]

**A**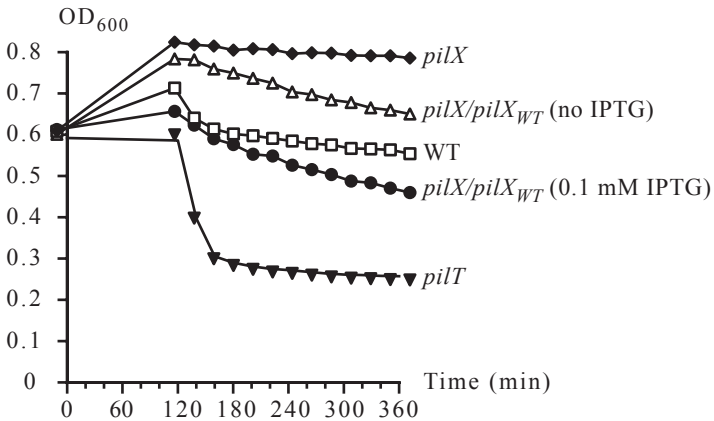**B**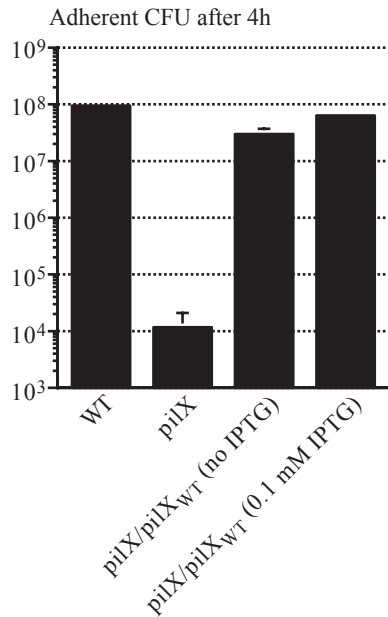

Supplement: pnas_0707581104_3.pdf [file pnas_0707581104_3.pdf]
